# Supplementary material for: Associations Between Life's Essential 8 and Chronic Kidney Disease
Source: PubMed Central journal article supplement — J Am Heart Assoc. 2023 Dec 8;12(24):e030564. doi: 10.1161/JAHA.123.030564 (PMC10863789; doi:10.1161/jaha.123.030564), 2023-12-08
Supplement: JAH3-12-e030564-s001.pdf [file JAH3-12-e030564-s001.pdf]

# **Supplemental Material**

**Table S1. Definition and scoring approach for the American Heart Association's Life's Essential 8 score.**

| <b>Domain</b>           | <b>CVH Metric</b> | <b>Measurement</b>                                                       | <b>Quantification and Scoring of CVH Metric</b>                                                                                                                                                                                                                                                                                                                                                                                                                                                            |
|-------------------------|-------------------|--------------------------------------------------------------------------|------------------------------------------------------------------------------------------------------------------------------------------------------------------------------------------------------------------------------------------------------------------------------------------------------------------------------------------------------------------------------------------------------------------------------------------------------------------------------------------------------------|
| <b>Health Behaviors</b> | Diet              | Healthy Eating Index-2015 diet score percentile                          | <p>Quantiles of DASH-style diet adherence or HEI-2015 (population)</p> <p><b>Scoring (Population):</b></p> <p><u>Points</u>   <u>Quantile</u></p> <p>100     <math>\geq</math> 95<sup>th</sup> percentile (top/ideal diet)</p> <p>80       75<sup>th</sup>- 94<sup>th</sup> percentile</p> <p>50       50<sup>th</sup> -74<sup>th</sup> percentile</p> <p>25       25<sup>th</sup> -49<sup>th</sup> percentile</p> <p>0        1<sup>st</sup>-24<sup>th</sup> percentile (bottom/least ideal quartile)</p> |
|                         | Physical activity | Self-reported minutes of moderate or vigorous physical activity per week | <p><b>Metric:</b> Minutes of moderate (or greater) intensity activity per week</p> <p><b>Scoring:</b></p> <p><u>Points</u>   <u>Minutes</u></p> <p>100     <math>\geq</math> 150</p> <p>90       120 - 149</p> <p>80       90 - 119</p> <p>60       60 - 89</p>                                                                                                                                                                                                                                            |

| Domain | CVH Metric        | Measurement                                                          | Quantification and Scoring of CVH Metric                                                                                                                                                                                                                                                                                                                                                                                                                                                     |
|--------|-------------------|----------------------------------------------------------------------|----------------------------------------------------------------------------------------------------------------------------------------------------------------------------------------------------------------------------------------------------------------------------------------------------------------------------------------------------------------------------------------------------------------------------------------------------------------------------------------------|
|        |                   |                                                                      | <p>40     30 - 59</p> <p>20     1 - 29</p> <p>0     0</p>                                                                                                                                                                                                                                                                                                                                                                                                                                    |
|        | Nicotine exposure | Self-reported use of cigarettes or inhaled nicotine- delivery system | <p><b>Metric:</b> Combustible tobacco use and/or inhaled NDS use; or secondhand smoke exposure</p> <p><b>Scoring:</b></p> <p><u>Points   Status</u></p> <p>100    Never smoker</p> <p>75     Former smoker, quit <math>\geq 5</math> y</p> <p>50     Former smoker, quit 1 - &lt; 5 y</p> <p>25     Former smoker, quit &lt; 1 y, or currently using inhaled NDS</p> <p>0      Current smoker</p> <p>Subtract 20 points (unless score is 0) for living with active indoor smoker in home</p> |
|        | Sleep health      | Self-reported average hours of sleep per night                       | <p><b>Metric:</b> Average hours of sleep per night</p> <p><b>Scoring:</b></p> <p><u>Points   Level</u></p> <p>100    7 - &lt;9</p>                                                                                                                                                                                                                                                                                                                                                           |

| Domain                | CVH Metric      | Measurement                                                              | Quantification and Scoring of CVH Metric                                                                                                                                                                                                 |
|-----------------------|-----------------|--------------------------------------------------------------------------|------------------------------------------------------------------------------------------------------------------------------------------------------------------------------------------------------------------------------------------|
|                       |                 |                                                                          | <p>90    9 - &lt; 10</p> <p>70    6 - &lt; 7</p> <p>40    5 - &lt; 6 or ≥ 10</p> <p>20    4 - &lt; 5</p> <p>0    &lt; 4</p>                                                                                                              |
| <b>Health Factors</b> | Body mass index | Body weight (kg) divided by height squared (m <sup>2</sup> )             | <p><b>Metric:</b> Body mass index (kg/m<sup>2</sup>)</p> <p><b>Scoring:</b></p> <p><u>Points</u>    <u>Level</u></p> <p>100    &lt; 25</p> <p>70    25.0 - 29.9</p> <p>30    30.0 - 34.9</p> <p>15    35.0 - 39.9</p> <p>0    ≥ 40.0</p> |
|                       | Blood lipids    | Plasma total and HDL-cholesterol with calculation of non-HDL-cholesterol | <p><b>Metric:</b> Non-HDL-cholesterol (mg/dL)</p> <p><b>Scoring:</b></p> <p><u>Points</u>    <u>Level</u></p> <p>100    &lt;130</p> <p>60    130 - 159</p> <p>40    160 - 189</p> <p>20    190 - 219</p> <p>0    ≥ 220</p>               |

| Domain | CVH Metric     | Measurement                                                  | Quantification and Scoring of CVH Metric                                                                                                                                                                                                                                                                                                                                                                                                                                                           |
|--------|----------------|--------------------------------------------------------------|----------------------------------------------------------------------------------------------------------------------------------------------------------------------------------------------------------------------------------------------------------------------------------------------------------------------------------------------------------------------------------------------------------------------------------------------------------------------------------------------------|
|        |                |                                                              | <p>If drug-treated level, subtract 20 points</p>                                                                                                                                                                                                                                                                                                                                                                                                                                                   |
|        | Blood glucose  | Fasting blood glucose or casual hemoglobin A1c               | <p><b>Metric:</b> Fasting blood glucose (mg/dL) or Hemoglobin A1c (%)</p> <p><b>Scoring:</b></p> <p><u>Points Level</u></p> <p>100 No history of diabetes and FBG &lt; 100 (or HbA1c &lt; 5.7)</p> <p>60 No diabetes and FBG 100 - 125 (or HbA1c 5.7 - 6.4) (Pre-diabetes)</p> <p>40 Diabetes with HbA1c &lt; 7.0</p> <p>30 Diabetes with HbA1c 7.0 - 7.9</p> <p>20 Diabetes with HbA1c 8.0 - 8.9</p> <p>10 Diabetes with Hb A1c 9.0 - 9.9</p> <p>0 Diabetes with HbA1c <math>\geq</math> 10.0</p> |
|        | Blood pressure | Appropriately measured systolic and diastolic blood pressure | <p><b>Metric:</b> Systolic and diastolic blood pressure (mm Hg)</p> <p><b>Scoring:</b></p> <p><u>Points Level</u></p> <p>100 &lt; 120/&lt; 80 (Optimal)</p> <p>75 120 - 129/&lt; 80 (Elevated)</p> <p>50 130 - 139 or 80 - 89 (Stage I HTN)</p>                                                                                                                                                                                                                                                    |

| Domain | CVH Metric | Measurement | Quantification and Scoring of CVH Metric                                                                  |
|--------|------------|-------------|-----------------------------------------------------------------------------------------------------------|
|        |            |             | 25      140 - 159 or 90 - 99<br><br>0 $\geq 160$ or $\geq 100$<br><br>Subtract 20 points if treated level |

CVH, cardiovascular health; FBG, Fasting blood glucose; HbA1c, Hemoglobin A1c

**Table S2. Healthy Eating Index-2015 Components & Scoring Standards\***

| <b>Component</b>           | <b>Maximum points</b> | <b>Standard for maximum score</b> | <b>Standard for minimum score of zero</b> |
|----------------------------|-----------------------|-----------------------------------|-------------------------------------------|
| Adequacy <sup>†</sup>      |                       |                                   |                                           |
| Total Fruits               | 5                     | ≥0.8 cup equiv. per 1,000 kcal    | No Fruit                                  |
| Whole Fruits               | 5                     | ≥0.4 cup equiv. per 1,000 kcal    | No Whole Fruit                            |
| Total Vegetables           | 5                     | ≥1.1 cup equiv. per 1,000 kcal    | No Vegetables                             |
| Greens and Beans           | 5                     | ≥0.2 cup equiv. per 1,000 kcal    | No Dark Green Vegetables or Legumes       |
| Whole Grains               | 10                    | ≥1.5 oz equiv. per 1,000 kcal     | No Whole Grains                           |
| Dairy                      | 10                    | ≥1.3 cup equiv. per 1,000 kcal    | No Dairy                                  |
| Total Protein Foods        | 5                     | ≥2.5 oz equiv. per 1,000 kcal     | No Protein Foods                          |
| Seafood and Plant Proteins | 5                     | ≥0.8 oz equiv. per 1,000 kcal     | No Seafood or Plant Proteins              |
| Fatty Acids <sup>‡</sup>   | 10                    | (PUFAs + MUFAs)/SFAs ≥2.5         | (PUFAs + MUFAs)/SFAs ≤1.2                 |
| Moderation <sup>§</sup>    |                       |                                   |                                           |
| Refined Grains             | 10                    | ≤1.8 oz equiv. per 1,000 kcal     | ≥4.3 oz equiv. per 1,000 kcal             |
| Sodium                     | 10                    | ≤1.1 gram per 1,000 kcal          | ≥2.0 grams per 1,000 kcal                 |
| Added Sugars               | 10                    | ≤6.5% of energy                   | ≥26% of energy                            |
| Saturated Fats             | 10                    | ≤8% of energy                     | ≥16% of energy                            |

\*Intakes between the minimum and maximum standards are scored proportionately.

†Adequacy components represent the food groups, subgroups, and dietary elements that are encouraged. For these components, higher scores reflect higher intakes, because higher intakes are desirable.

‡Ratio of poly- and monounsaturated fatty acids (PUFAs and MUFAs) to saturated fatty acids (SFAs).

§Moderation components represent the food groups and dietary elements for which there are recommended limits to consumption. For moderation components, higher scores reflect lower intakes, because lower intakes are more desirable.



**Figure S1. Flow chart of the screening process for the selection of the study population.**

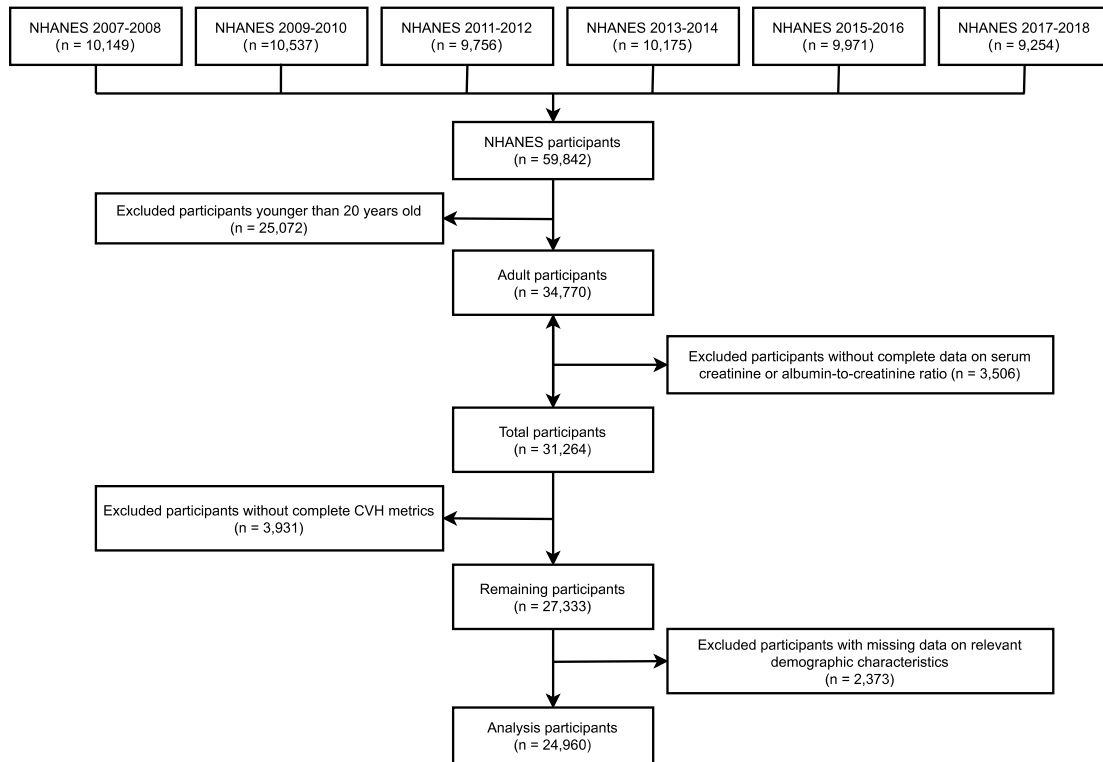

NHANES, National Health and Nutrition Examination Survey; CVH, cardiovascular health
